# Supplementary material for: Suppression of the ERK–SRF axis facilitates somatic cell reprogramming
Source: PubMed Central journal article supplement — Exp Mol Med. 2018 Feb 23;50(2):e448–. doi: 10.1038/emm.2017.279 (PMC5903827; doi:10.1038/emm.2017.279), 2018-02-23

# Supplementary Fig 1

**a**

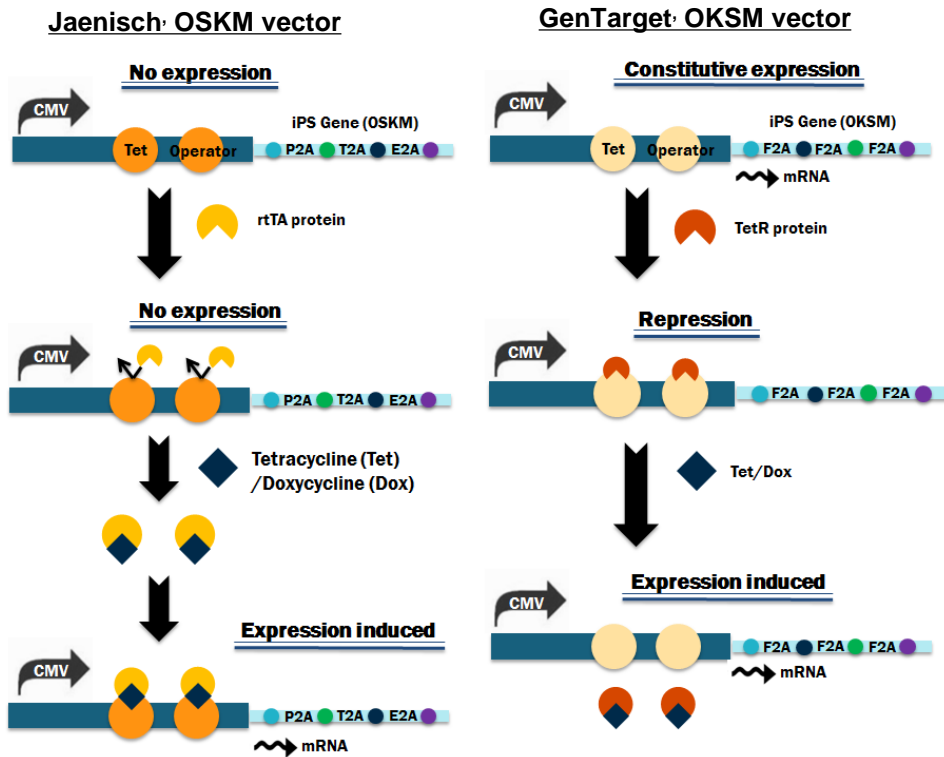

**b**

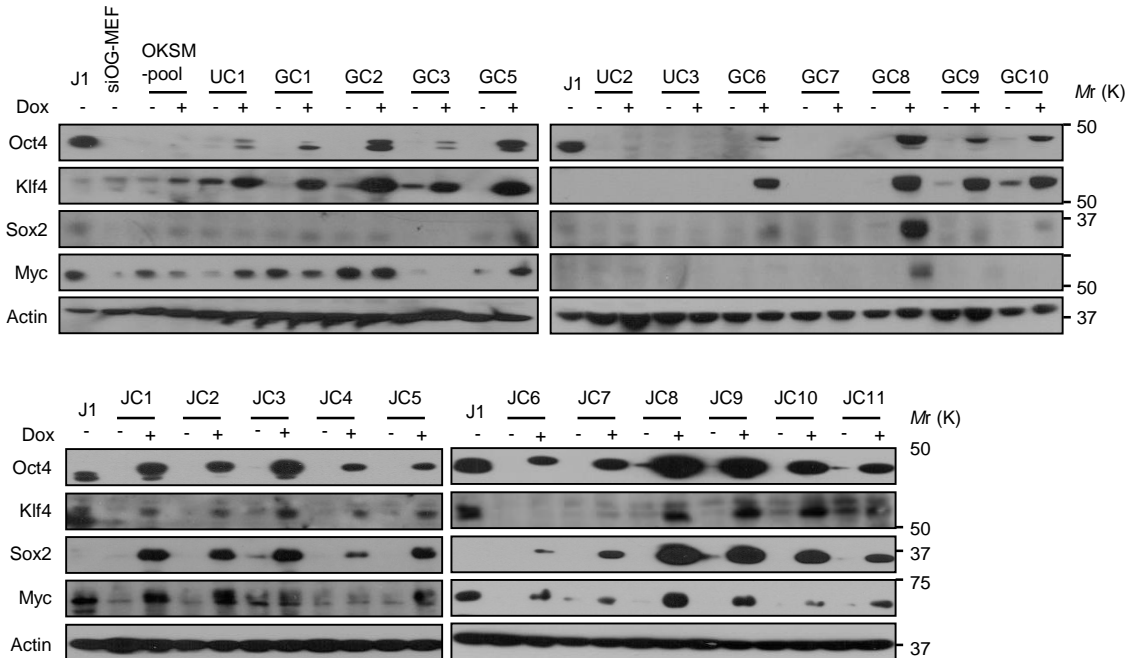

# Supplementary Fig 2

**a**

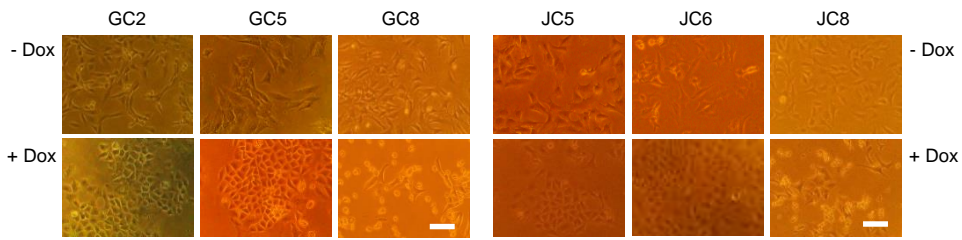

**b**

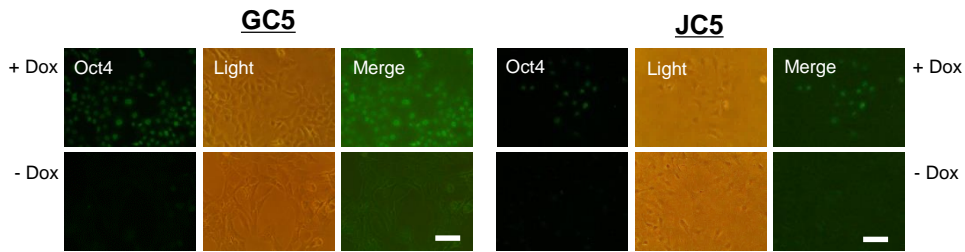

**c**

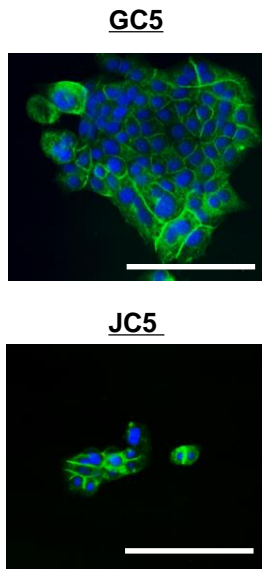

**d**

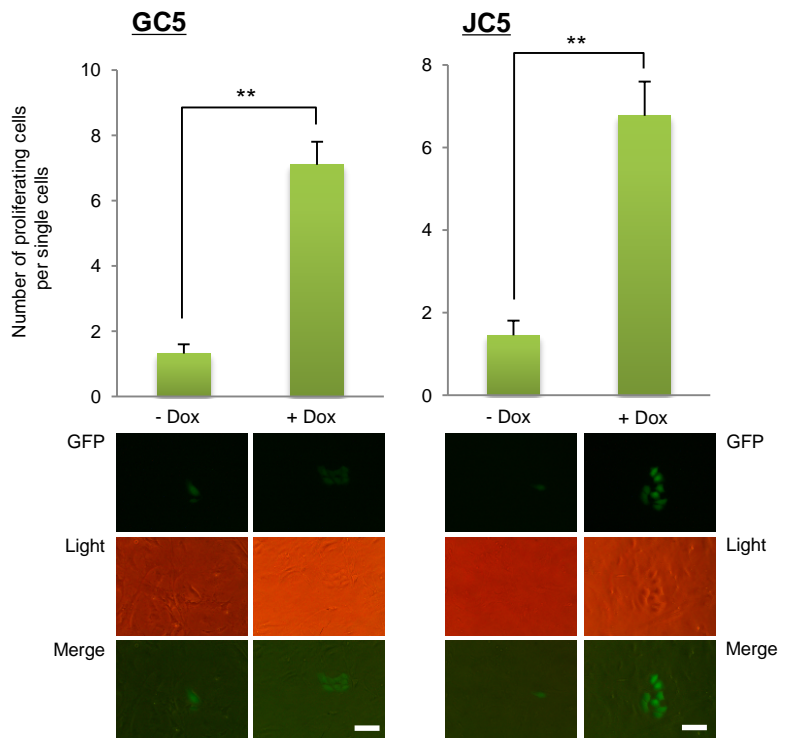

# Supplementary Fig 3

**a**

## GC5

Epidermal autoregulatory factor 1 homolog isoform 1  
(Mus musculus strain C57BL/6J chromosome 7, GRCm38.p2 C57BL/6J)

GGAAAGTCATCCTAAGAACATTCTCAGTAGAAGAGACC**AAGCAATAGGTCCA**  
**GCCAGCTGTAGCCG**GAGGGGCTGAGGTAAGGGCTCTCAGCCTAGCACTTCT  
 TGAAAGTTACTATACCCTATAGCTATTAGGTGAGCAAGGCTATAGCCACCC  
 CTGTTATTAGAAACCTATCTATCCCTTGGTGGGCTGAGCGAGAAGACCAA  
 CCTGGAGTGGAGCCTCTCTTCAACCTGAGCAAGAGGAGGGTCCCTGCGCA  
 CCTCTGAGCAGCTCTTCTCTTTGCACTTGGAACTTCTTATGGGTGTTTACT  
 GAGTG-  
 -TGGAAGGGCTAATTCACCTCCAACGAAGACAAGATATCCTTGATCTGTGGA  
 TCTACCACACACAAGGCTACTTCCCTGATTGCGAGAAGCTACACACAGGGC  
 CAGGGATCAGATATCCACTGACCTTTGGATGGTGCTACAAGCTAGTACCAG  
 TTGAGCAAGAGAAGGTAGAAGAAGCCATTGAAGGAAAAGAACACCCGCTTG  
 TTACACCTGTGAGCCTGCATGGGATGGATGACCCGGAGAGAGAAGTATTA  
 GAGTGA**GGTTTGACAGCCCGCTAGCATTTCATCACAT**GGCCCGAGAGCTGC  
 ATCCGGA

Chromosome7  
(141317192)  
Lentiviral  
sequence

## JC5

pleckstrin homology-like domain family A member: KRR' small  
subunit (Mus musculus strain C57BL/6J chromosome  
10, GRCm38.p2 C57BL/6J)

TTTTTCAAAC**TTTGTATGCTTTTCTCCCCAGCTGACCT**CCCAAGTATTTCA  
 AGGGTGACTTGGGGTAAGATTCAAAGCCATAAACTAAGGAGTAATTTAGAG  
 CTGGATTTTTCAGTAAGGGTCTAAATTCCTCTCTTTGTCTCCAAGACTGT  
 CTGACTTTCCCTTGGCCACTCAGACAAAACAAGAACTGATCCGTTGGTCT  
 CATTGGCCAAGGGTCTCATCCCTCTGGTACACAGGTCACCTTCTGGACCAT  
 GAGTT-  
 -TGGAAGGGCTAATTCACCTCCAACGAAGACAAGATATCCTTGATCTGTGGA  
 TCTACCACACACAAGGCTACTTCCCTGATTGCGAGAAGCTACACACAGGGC  
 CAGGGATCAGATATCCACTGACCTTTGGATGGTGCTACAAGCTAGTACCAG  
 TTGAGCAAGAGAAGGTAGAAGAAGCCATTGAAGGAAAAGAACACCCGCTTG  
 TTACACCTGTGAGCCTGCATGGGATGGATGACCCGGAGAGAGAAGTATTA  
 GAGTGA**GGTTTGACAGCCCGCTAGCATTTCATCACAT**GGCCCGAGAGCTGC  
 ATCCGGA

Chromosome10  
(111690355)  
Lentiviral  
sequence

**b**

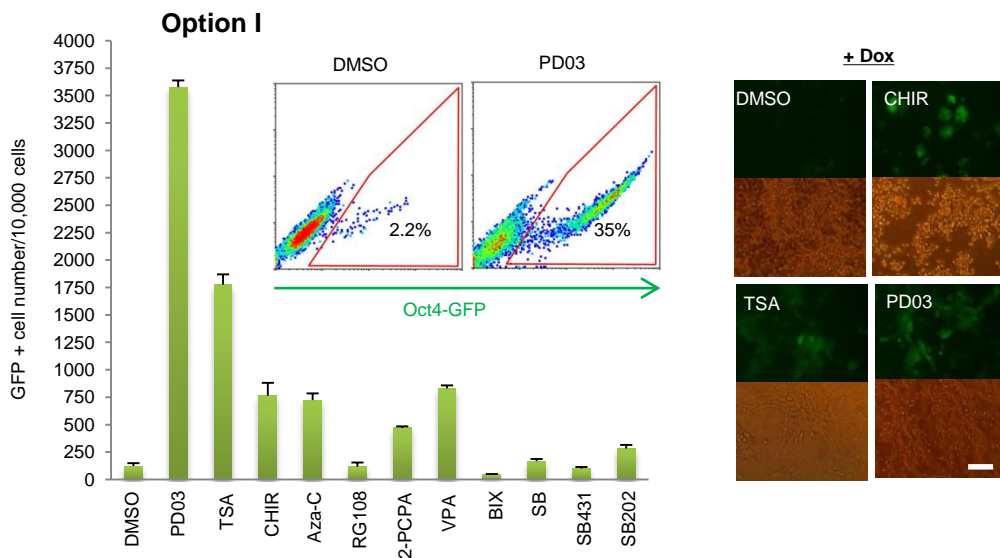

**c**

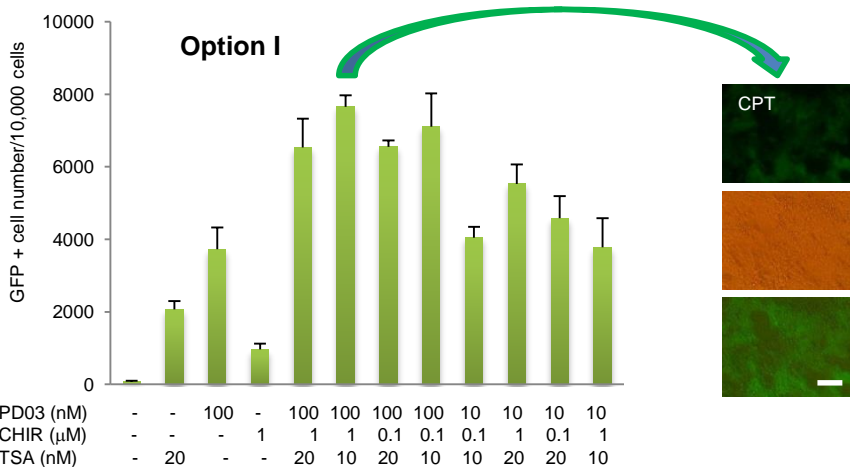

# Supplementary Fig 4

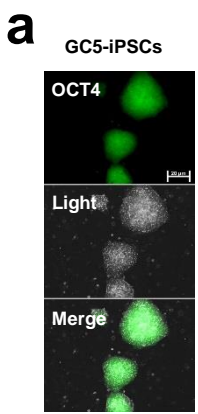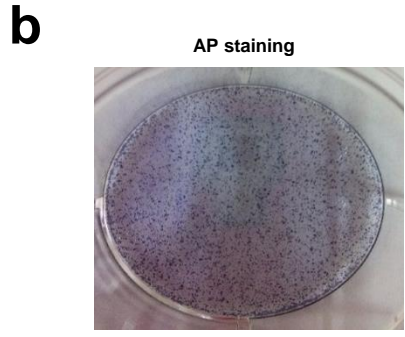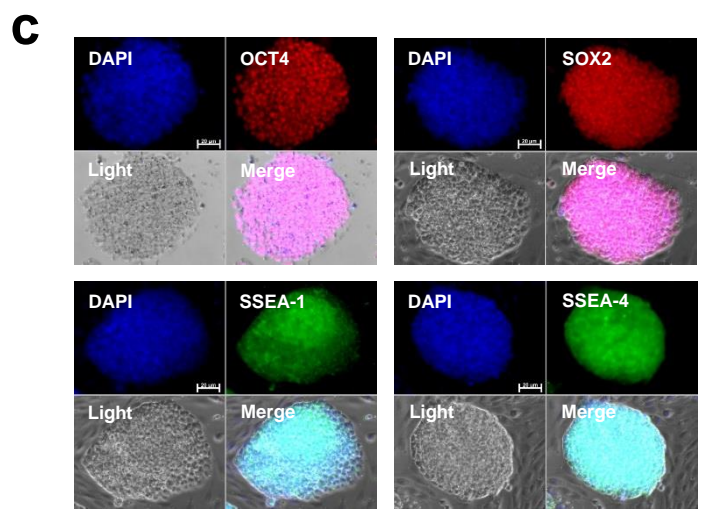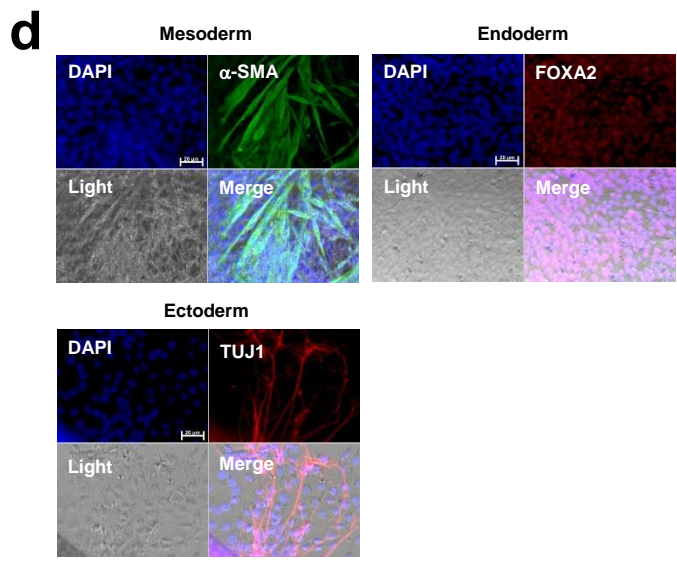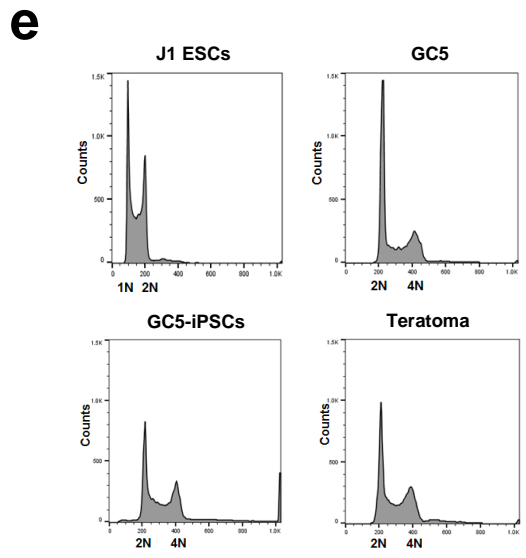

# Supplementary Fig 5

## Human Phospho-Kinase Profiler Array

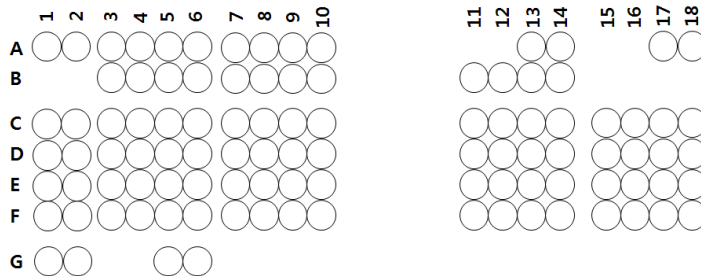

| Membrane/Coordinate | Target/Control         | Phosphorylation Site | Cell Source/treatment                  |
|---------------------|------------------------|----------------------|----------------------------------------|
| A · A1, A2          | Positive Control       | -                    | -                                      |
| A · A3, A4          | p38α                   | T180/Y182            | MCF-7/UV*                              |
| A · A5, A6          | ERK 1/2                | T202/Y204, T185/Y187 | HeLa/PMA*                              |
| A · A7, A8          | JNK pan                | T183/Y185, T221/Y223 | MCF-7/UV*                              |
| A · A9, A10         | GSK-3α/β               | S21/S9               | MCF-7/rhIGF-1                          |
| B · A13, A14        | p53                    | S392                 | MCCF-7/CPT*                            |
| B · A17, A18        | Positive Control       | -                    | -                                      |
| A · B3, B4          | MEK1/2                 | S218/S222, S222/S226 | MCF-7/UV*                              |
| A · B5, B6          | MSK1/2                 | S376/S360            | HeLa/PMA*                              |
| A · B7, B8          | AMPKα1                 | T174                 | Jurkat/H <sub>2</sub> O <sub>2</sub> * |
| A · B9, B10         | Akt                    | S473                 | MCF-7/rhIGF-1*                         |
| B · B11, B12        | Akt                    | T308                 | K562/Pervanadate                       |
| B · B13, B14        | p53                    | S46                  | MCF-7/CPT*                             |
| A · C1, C2          | TOR                    | S2448                | MCF-7/UV*                              |
| A · C3, C4          | CREB                   | S133                 | Jurkat/H <sub>2</sub> O <sub>2</sub> * |
| A · C5, C6          | HSP27                  | S78/S82              | HeLa/PMA*                              |
| A · C7, C8          | AMPKα2                 | T172                 | HepG2/Metformin                        |
| A · C9, C10         | β-Catenin              | -                    | HeLa/PMA*                              |
| B · C11, C12        | p70 S6 Kinase          | T389                 | MCF-7/CPT*                             |
| B · C13, C14        | p53                    | S15                  | MCF-7/CPT*                             |
| B · C15, C16        | p27                    | T198                 | Jurkat/H <sub>2</sub> O <sub>2</sub> * |
| B · C17, C18        | Paxillin               | Y118                 | K562/Pervanadate                       |
| A · D1, D2          | Src                    | Y419                 | Colo205/SFM*                           |
| A · D3, D4          | Lyn                    | Y397                 | Daudi/Pervanadate                      |
| A · D5, D6          | Lck                    | Y394                 | Jurkat/Pervanadate                     |
| A · D1, D8          | STAT2                  | Y689                 | Daudi/rhIFN-α2A                        |
| A · D9, D10         | STAT5a                 | Y699                 | U937/PMA + rhIL-4                      |
| B · D11, D12        | p70 S6 Kinase          | T421/S424            | MCF-7/UV*                              |
| B · D13, D14        | RSK1/2/3               | S380                 | HeLa/PMA*                              |
| B · D15, D16        | p27                    | T157                 | K562/Pervanadate                       |
| B · D17, D18        | PLCγ-1                 | Y783                 | Jurkat/H <sub>2</sub> O <sub>2</sub> * |
| A · E1, E2          | Fyn                    | Y420                 | Daudi/Pervanadate                      |
| A · E3, E4          | Yes                    | Y426                 | K562/Pervanadate                       |
| A · E5, E6          | Fgr                    | Y412                 | K562/Pervanadate                       |
| A · E7, E8          | STAT3                  | Y705                 | LNcap/rhIL-6                           |
| A · E9, E10         | STAT5b                 | Y699                 | Daudi/rhIFN-α2A                        |
| B · E11, E12        | p70 S6 Kinase          | T229                 | MCF-7/CPT*                             |
| B · E13, E14        | RSK1/2                 | S221                 | U937/PMA + rhIL-4                      |
| B · E15, E16        | c-Jun                  | S63                  | HeLa/PMA*                              |
| B · E17, E18        | Pyk2                   | Y402                 | K562/Pervanadate*                      |
| A · F1, F2          | Hck                    | Y411                 | Daudi/Pervanadate                      |
| A · F3, F4          | Chk-2                  | T68                  | HeLa/CPT*                              |
| A · F5, F6          | FAK                    | Y397                 | HepG2/Pervanadate                      |
| A · F7 F8           | STAT6                  | Y641                 | U937/PMA + rhIL-4                      |
| A · F9, F10         | STAT5a/b               | Y699                 | Daudi/rhIFN-α2A                        |
| B · F11, F12        | STAT1                  | Y701                 | Daudi/rhIFN-α2A                        |
| B · F13, F14        | STAT4                  | Y693                 | NC-37/Pervanadate                      |
| B · F15, F16        | eNOS                   | S1177                | Jurkat/H <sub>2</sub> O <sub>2</sub> * |
| B · F17, F18        | PBS (Negative Control) | -                    | -                                      |
| A · G1, G2          | Positive Control       | -                    | -                                      |
| A · G5, G6          | PBS (Negative Control) | -                    | -                                      |

# Supplementary Fig 6

**a**

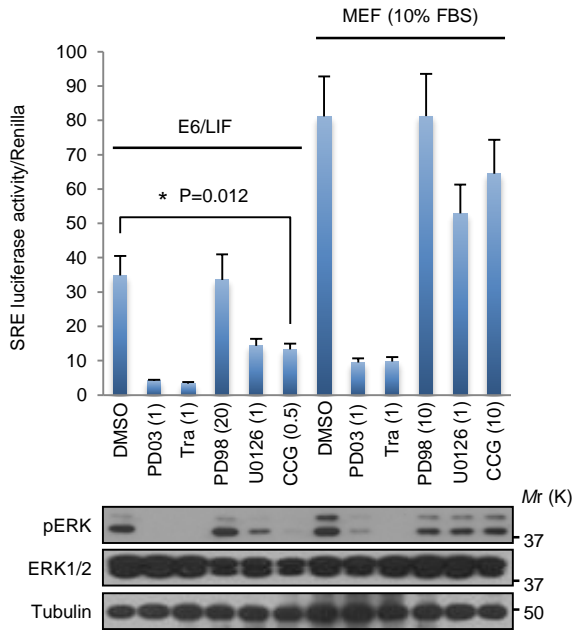

**b**

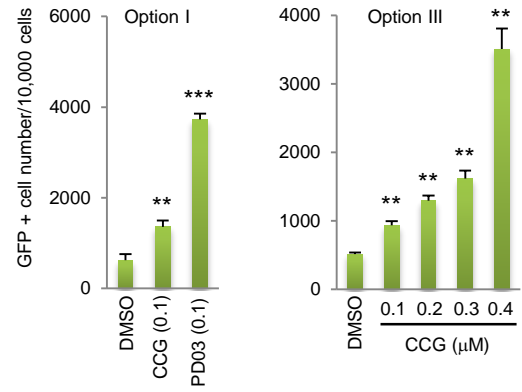

# Supplementary Fig 7

**a**

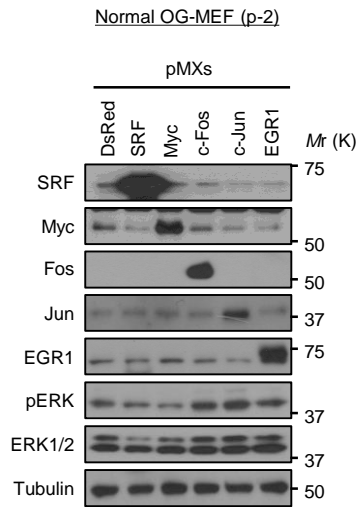

**b**

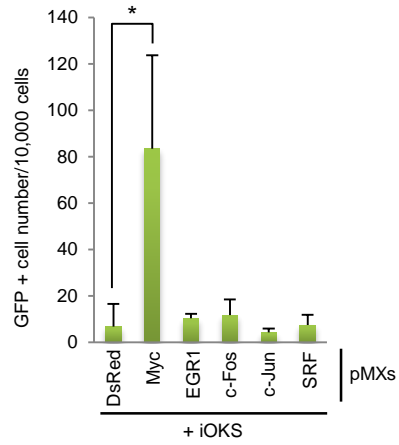

**c**

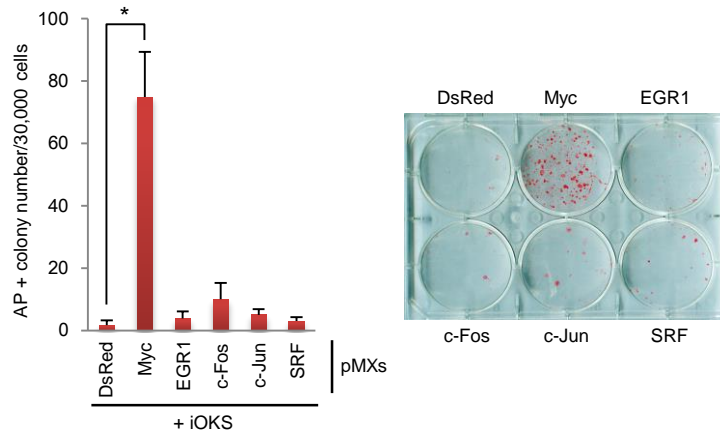

# Supplementary Fig 8

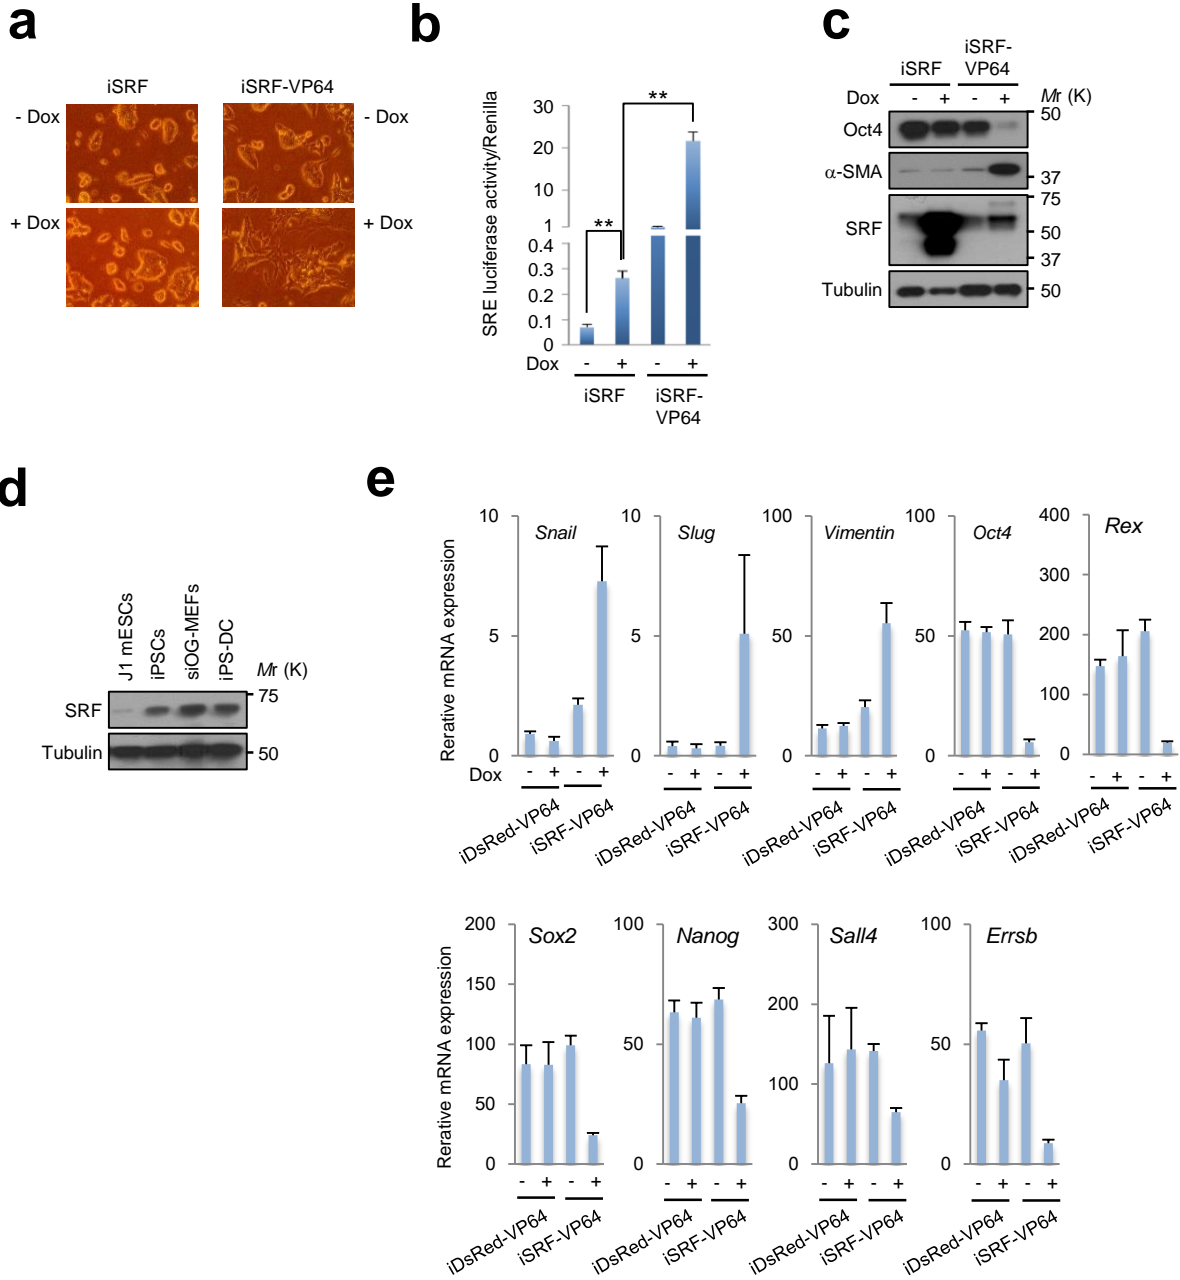

Supplement: emm2017279x2.pdf [file emm2017279x2.pdf]
